# Supplementary material for: Efficient catalytic effect of the page-like MnCo2O4.5 catalyst on the hydrogen storage performance of MgH2
Source: Royal Society of Chemistry journal article supplement (doi:10.1039/d2qi01715f), 2022-01-01
Supplement: d2qi01715f1.pdf [file d2qi01715f1.pdf]

| (a)                    |      |         |         |                     | (b)                    |      |         |         |                     |
|------------------------|------|---------|---------|---------------------|------------------------|------|---------|---------|---------------------|
| Heatflow Curve Values: |      |         |         |                     | Heatflow Curve Values: |      |         |         |                     |
| Index                  | t    | Ts      | Tr      | Value               | Index                  | t    | Ts      | Tr      | Value               |
|                        | [s]  | [°C]    | [°C]    | [Wg <sup>-1</sup> ] |                        | [s]  | [°C]    | [°C]    | [Wg <sup>-1</sup> ] |
| 0                      | 0    | 37.8259 | 40      | 1.61613             | 0                      | 0    | 39.5096 | 40      | 1.26511             |
| 11                     | 11   | 38.0089 | 40.3667 | 1.52408             | 5                      | 5    | 39.5906 | 40.4167 | 1.22944             |
| 22                     | 22   | 38.5688 | 40.7333 | 1.41082             | 10                     | 10   | 39.7611 | 40.8333 | 1.19424             |
| 33                     | 33   | 39.0779 | 41.1    | 1.31626             | ---                    | ---  | ---     | ---     | ---                 |
| 44                     | 44   | 39.6114 | 41.4667 | 1.24743             | ---                    | ---  | ---     | ---     | ---                 |
| 55                     | 55   | 40.1107 | 41.8333 | 1.1962              | ---                    | ---  | ---     | ---     | ---                 |
| 8096                   | 8096 | 311.783 | 309.867 | 1.36444             | 3525                   | 3525 | 329.961 | 333.75  | -2.01876            |
| 8107                   | 8107 | 312.246 | 310.233 | 1.15928             | 3530                   | 3530 | 330.366 | 334.167 | -2.08727            |
| 8118                   | 8118 | 312.499 | 310.6   | 1.01853             | 3535                   | 3535 | 330.773 | 334.583 | -2.12841            |
| 8129                   | 8129 | 312.766 | 310.967 | 0.944001            | 3540                   | 3540 | 331.588 | 335     | -2.14988            |
| 8140                   | 8140 | 313.222 | 311.333 | 0.931907            | 3545                   | 3545 | 331.609 | 335.417 | -2.14959            |
| 8151                   | 8151 | 313.594 | 311.7   | 0.967219            | 3550                   | 3550 | 332.017 | 335.833 | -2.1312             |
| 8162                   | 8162 | 313.993 | 312.067 | 1.04153             | 3555                   | 3555 | 332.439 | 336.25  | -2.09557            |
| 8173                   | 8173 | 314.455 | 312.433 | 1.1409              |                        |      |         |         |                     |
| 8184                   | 8184 | 314.776 | 312.8   | 1.25654             |                        |      |         |         |                     |

  

| (c)                    |      |         |         |                     | (d)                    |      |         |       |                     |     |
|------------------------|------|---------|---------|---------------------|------------------------|------|---------|-------|---------------------|-----|
| Heatflow Curve Values: |      |         |         |                     | Heatflow Curve Values: |      |         |       |                     |     |
| Index                  | t    | Ts      | Tr      | Value               | Index                  | t    | Ts      | Tr    | Value               |     |
|                        | [s]  | [°C]    | [°C]    | [Wg <sup>-1</sup> ] |                        | [s]  | [°C]    | [°C]  | [Wg <sup>-1</sup> ] |     |
| 0                      | 0    | 27.6365 | 40      | 1.2237              | 0                      | 0    | 28.0751 | 40    | 1.15433             |     |
| 4                      | 4    | 27.8103 | 40.5333 | 1.15552             | 3                      | 3    | 28.2063 | 40.5  | 1.17941             |     |
| 8                      | 8    | 27.9506 | 41.0667 | 1.04613             | 6                      | 6    | 28.304  | 41    | 1.21066             |     |
| 12                     | 12   | 28.1437 | 41.6    | 0.942159            | 9                      | 9    | 28.4983 | 41.5  | 1.2536              |     |
| 16                     | 16   | 28.4468 | 42.1333 | 0.842429            | 12                     | 12   | 28.7678 | 42    | 1.32262             |     |
| ---                    | ---  | ---     | ---     | ---                 | ---                    | ---  | ---     | ---   | ---                 | --- |
| 2408                   | 2408 | 348.919 | 361.067 | -5.23123            | 1992                   | 1992 | 360.074 | 372   | 0.686437            |     |
| 2412                   | 2412 | 349.367 | 361.6   | -5.26756            | 1995                   | 1995 | 360.582 | 372.5 | 0.663678            |     |
| 2416                   | 2416 | 349.412 | 362.133 | -5.2741             | 1998                   | 1998 | 361.121 | 373   | 0.644021            |     |
| 2420                   | 2420 | 350.487 | 362.667 | -5.2242             | 2001                   | 2001 | 361.685 | 373.5 | 0.663188            |     |
| 2424                   | 2424 | 351.088 | 363.2   | -5.15787            | 2004                   | 2004 | 362.102 | 374   | 0.689343            |     |
| ---                    | ---  | ---     | ---     | ---                 | 2007                   | 2007 | 362.631 | 374.5 | 0.722401            |     |

Fig. 1 DSC raw datas at four different heating rates of (a) 2 °C/min, (b) 5 °C/min, (c) 8 °C/min and (d) 10 °C/min.
